# Supplementary material for: Emerging investigators series: prioritization of suspect hits in a sensitive suspect screening workflow for comprehensive micropollutant characterization in environmental samples
Source: Royal Society of Chemistry journal article supplement (doi:10.1039/c6ew00248j), 2016-11-24
Supplement: c6ew00248j1.pdf [file c6ew00248j1.pdf]

**ELECTRONIC SUPPORTING INFORMATION FOR:**

**TITLE:** Prioritization of suspect hits in a sensitive suspect screening workflow for comprehensive micropollutant characterization in environmental samples

**AUTHORS:** Amy L. Pochodylo and Damian E. Helbling

**AFFILIATION:** School of Civil and Environmental Engineering, Cornell University, Ithaca, NY, USA

**CORRESPONDING AUTHOR:** Damian E. Helbling, School of Civil and Environmental Engineering, Cornell University, 220 Hollister Hall, Ithaca, NY, 14853, USA. Email: [damian.helbling@cornell.edu](mailto:damian.helbling@cornell.edu). Tel: +1 607 255 5146. Fax: +1 607 255 9004.

## Table of Contents

|                                                                            |    |
|----------------------------------------------------------------------------|----|
| Methods – Sample Enrichment .....                                          | 3  |
| Methods - Analytical method .....                                          | 4  |
| Methods - Validation compounds .....                                       | 5  |
| Results – Development and optimization of suspect screening workflow ..... | 11 |
| Results – Application of suspect screening workflow .....                  | 19 |
| Results – Prioritization strategies .....                                  | 20 |
| Results – Investigated compounds .....                                     | 29 |

## Methods – Sample Enrichment

The samples were passed over a self-packed mixed bed cartridge containing three layers separated by polyethylene frits. The bottom layer consisted of 200 mg Envi-CARB (Supelclean) media. The middle layer was 350 mg of a 1:1:1.5 (by mass) mixture of Strata X-AW (Phenomenex), Strata X-CW (Phenomenex), and Isolute ENV+ (Biotage), respectively. The final layer was 200 mg of Oasis HLB (Waters) media. This mixed bed cartridge was designed to enrich neutral, cationic, and anionic species with a broad range of polarities. The analytes were eluted using 6 mL of 50:50 v/v ethyl acetate/methanol with 0.5% ammonia, 3 mL of 50:50 v/v ethyl acetate/methanol with 1.7% formic acid, and 2 mL of pure methanol. The extracts were evaporated under a stream of high-purity nitrogen to 100  $\mu$ L and reconstituted to 1 mL using nanopure water. The extracted samples were filtered (regenerated cellulose, 0.45  $\mu$ m, Thermo Scientific) and stored at -20 °C and in the dark until analysis.

## Methods - Analytical method

Samples were injected into the column at 20  $\mu$ L with an initial mobile phase of 90% A and elution from the column was achieved with a final mobile phase of 5% A. An eluent gradient was used to achieve separation of analytes. The percentage of A was linearly decreased to 50% over four minutes, and then linearly decreased to 5% A for thirteen minutes; the gradient was then held at 5% A for eight minutes before returning to 90% A and remaining at that point until the end of the separation method at 29 minutes. Mass calibrations and mass accuracy checks were performed before each sequence of measurements; resolution was always greater than 140,000 (at mass of 200) and mass accuracy was always within  $\pm 1$  ppm.

**Table ES-1.** QExactive method parameters for full scan MS acquisition and data-dependent MS2 experiments.

| Parameter             |                   | Value                       |
|-----------------------|-------------------|-----------------------------|
| Voltage (pos/neg)     |                   | 4kV/3kV                     |
| Sheath gas            |                   | 40                          |
| Aux gas               |                   | 20                          |
| Capillary temperature |                   | 320°C                       |
| Source temperature    |                   | 50°C                        |
| Full MS               | Resolution        | 140,000                     |
|                       | Polarity          | Positive/Negative Switching |
|                       | AGC Target        | 5e5                         |
|                       | Maximum IT        | 250 ms                      |
|                       | Scan range        | 100 to 1000 m/z             |
| dd-MS <sup>2</sup>    | Resolution        | 17,500                      |
|                       | AGC target        | 2e5                         |
|                       | Maximum IT        | 100 ms                      |
|                       | Loop count        | 5                           |
|                       | Isolation window  | 1.0 m/z                     |
|                       | Dynamic exclusion | 8 sec                       |

## Methods - Validation compounds

**Table ES-2.** Names, structures, compound class, and analytical details for the 45 validation compounds.

| Compound                  | CAS No.    | Compound Class | Structure | Accurate Mass & Adduct | RT (min) | Fragments                    |
|---------------------------|------------|----------------|-----------|------------------------|----------|------------------------------|
| 2,4-D                     | 94-75-7    | Pesticide      |           | 218.9621<br>[M-H]-     | 8.1      | 160.96,<br>124.98            |
| Acetaminophen             | 103-90-2   | Pharm          |           | 152.0706<br>[M+H]+     | 2.3      | 110.06,<br>93.04, 65.04      |
| Atenolol Acid             | 56392-14-4 | Pharm          |           | 268.1543<br>[M+H]+     | 3.3      | 145.06,<br>191.07,<br>226.11 |
| 5-methyl-1H-benzotriazole | 136-85-6   | Other          |           | 134.0713<br>[M+H]+     | 5.1      | 106.07,<br>53.04, 79.05      |
| Caffeine                  | 58-08-2    | Lifestyle      |           | 195.0877<br>[M+H]+     | 3.4      | 138.07,<br>110.07,<br>84.96  |
| Carbamazepine             | 298-46-4   | Pharm          |           | 237.1022<br>[M+H]+     | 6.6      | 194.10,<br>192.08            |
| Carbofuran                | 1563-66-2  | Pesticide      |           | 222.1125<br>[M+H]+     | 6.05     | 123.04,<br>165.09,<br>137.06 |
| Chloridazon               | 1698-60-8  | Pesticide      |           | 222.0429<br>[M+H]+     | 4.5      | 104.05,<br>92.05,<br>146.01  |

|                 |            |           |                                                                                      |                                |      |                              |
|-----------------|------------|-----------|--------------------------------------------------------------------------------------|--------------------------------|------|------------------------------|
| cis-Diltiazem   | 42399-41-7 | Pharm     | 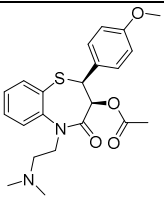  | 415.1693<br>[M+H] <sup>+</sup> | 6.4  | 310.09,<br>178.03            |
| Citalopram      | 59729-33-8 | Pharm     |    | 325.1711<br>[M+H] <sup>+</sup> | 5.9  | 109.04,<br>262.10,<br>234.07 |
| Clofibric Acid  | 882-09-7   | Pharm     |    | 213.0324<br>[M-H] <sup>-</sup> | 8.9  | 126.99,<br>85.08             |
| Codeine         | 76-57-3    | Pharm     |   | 300.1594<br>[M+H] <sup>+</sup> | 2.52 | 215.11,<br>243.10            |
| Dimethoate      | 60-51-5    | Pesticide |    | 230.0069<br>[M+H] <sup>+</sup> | 4.5  | 142.99,<br>170.97,<br>88.02  |
| Diphenhydramine | 58-73-1    | Pharm     |   | 256.1701<br>[M+H] <sup>+</sup> | 5.95 | 167.09,<br>152.06            |
| Diuron          | 330-54-1   | Pesticide |  | 233.0243<br>[M+H] <sup>+</sup> | 7.9  | 137.07,<br>94.07,<br>177.06  |
| Fluconazole     | 86386-73-4 | Pharm     |  | 307.1113<br>[M+H] <sup>+</sup> | 4.5  | 220.07,<br>238.08,<br>169.05 |

|              |             |           |                                                                                      |                                 |      |                              |
|--------------|-------------|-----------|--------------------------------------------------------------------------------------|---------------------------------|------|------------------------------|
| Hydrocodone  | 125-29-1    | Pharm     | 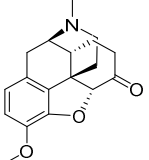  | 300.1599<br>[M+H] <sup>+</sup>  | 2.84 | 199.08,<br>241.09            |
| Ibuprofen    | 15687-27-1  | Pharm     |    | 229.0864<br>[M+Na] <sup>+</sup> | 11.9 | 151.04,<br>101.06,<br>83.05  |
| Imidacloprid | 138261-41-3 | Pesticide |   | 256.0596<br>[M+H] <sup>+</sup>  | 4.0  | 175.10,<br>209.06,<br>128.03 |
| Ketoprofen   | 22071-15-4  | Pharm     |    | 255.1016<br>[M+H] <sup>+</sup>  | 8.45 | 105.04,<br>209.10,<br>177.05 |
| Linuron      | 330-55-2    | Pesticide |    | 249.0192<br>[M+H] <sup>+</sup>  | 8.9  | 159.97,<br>182.02,<br>160.98 |
| Malaoxon     | 1634-78-2   | Pesticide |    | 315.0667<br>[M+H] <sup>+</sup>  | 6.2  | 99.01,<br>127.04,<br>142.99  |
| MCPA         | 94-74-6     | Pesticide |   | 199.0156<br>[M-H] <sup>-</sup>  | 8.4  | 141.01                       |
| Mecoprop     | 93-65-2     | Pesticide |  | 213.0324<br>[M-H] <sup>-</sup>  | 9.7  | 141.01                       |
| Metaxalone   | 1665-48-1   | Pharm     |  | 222.1125<br>[M+H] <sup>+</sup>  | 7.05 | 133.10,<br>105.07,<br>161.10 |
| Metoprolol   | 37350-58-6  | Pharm     |  | 268.1907<br>[M+H] <sup>+</sup>  | 4.5  | 191.11,<br>159.08,<br>116.11 |

|                |            |           |                                                                                       |                                |      |                              |
|----------------|------------|-----------|---------------------------------------------------------------------------------------|--------------------------------|------|------------------------------|
| DEET           | 134-62-3   | Pesticide | 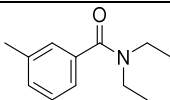   | 192.1383<br>[M+H] <sup>+</sup> | 7.5  | 119.05,<br>91.05, 72.04      |
| Nadolol        | 42200-33-9 | Pharm     |     | 310.2013<br>[M+H] <sup>+</sup> | 3.55 | 254.14,<br>201.09,<br>236.13 |
| Naproxen       | 22204-53-1 | Pharm     |     | 231.1016<br>[M+H] <sup>+</sup> | 9.0  | 175.06,<br>185.10,<br>170.07 |
| Oxcarbazepine  | 28721-07-5 | Pharm     |    | 253.0972<br>[M+H] <sup>+</sup> | 5.7  | 208.08,<br>180.08,<br>236.07 |
| Phenytoin      | 57-41-0    | Pharm     |    | 253.0977<br>[M+H] <sup>+</sup> | 6.5  | 182.10,<br>104.05            |
| Pirimicarb     | 23103-98-2 | Pesticide |    | 239.1503<br>[M+H] <sup>+</sup> | 4.1  | 72.04,<br>137.07,<br>182.13  |
| Primidone      | 125-33-7   | Pharm     |   | 219.1128<br>[M+H] <sup>+</sup> | 4.6  | 91.05,<br>162.09,<br>119.09  |
| Propachlor     | 1918-16-7  | Pesticide |  | 212.0837<br>[M+H] <sup>+</sup> | 7.5  | 170.04,<br>94.07,<br>106.07  |
| Propachlor-OXA | 70628-36-3 | Pesticide |  | 208.0968<br>[M+H] <sup>+</sup> | 4.8  | 120.04,<br>92.05             |



|                        |             |           |                                                                                       |                                 |      |                              |
|------------------------|-------------|-----------|---------------------------------------------------------------------------------------|---------------------------------|------|------------------------------|
| Propyzamide            | 23950-58-5  | Pesticide | 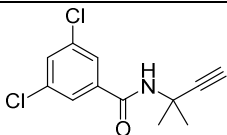    | 256.0296<br>[M+H] <sup>+</sup>  | 9.6  | 189.98,<br>172.96,<br>67.05  |
| Pseudoephedrine        | 299-42-3    | Pharm     |    | 166.1229<br>[M+H] <sup>+</sup>  | 2.8  | 133.09,<br>148.11,<br>117.07 |
| Siduron                | 1982-49-6   | Pesticide |     | 233.1654<br>[M+H] <sup>+</sup>  | 8.9  | 137.07,<br>94.07,<br>120.04  |
| Sitagliptin            | 486460-32-6 | Pharm     |     | 408.1254<br>[M+H] <sup>+</sup>  | 4.6  | 235.08,<br>174.05,<br>193.07 |
| Sucralose <sup>a</sup> | 56038-13-2  | Lifestyle |     | 441.0128<br>[M+FA] <sup>-</sup> | 3.9  | 185.02,<br>121.03            |
| Sulfathiazole          | 72-14-0     | Pharm     |     | 256.0209<br>[M+H] <sup>+</sup>  | 2.6  | 156.01,<br>108.04,<br>68.05  |
| Terbutylazine          | 5915-41-3   | Pesticide |    | 230.1167<br>[M+H] <sup>+</sup>  | 9.0  | 174.05                       |
| Thiabendazole          | 148-79-8    | Pharm     |  | 202.0433<br>[M+H] <sup>+</sup>  | 3.45 | 175.03,<br>131.06            |
| Valsartan              | 137862-53-4 | Pharm     |   | 436.2343<br>[M+H] <sup>+</sup>  | 9.7  | 235.10,<br>291.19,<br>207.09 |

|             |            |       |                                                                                     |                                |     |                             |
|-------------|------------|-------|-------------------------------------------------------------------------------------|--------------------------------|-----|-----------------------------|
| Venlafaxine | 93413-69-5 | Pharm | 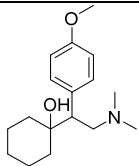 | 278.2115<br>[M+H] <sup>+</sup> | 5.5 | 121.06,<br>147.08,<br>58.07 |
|-------------|------------|-------|-------------------------------------------------------------------------------------|--------------------------------|-----|-----------------------------|

<sup>a</sup>The [M+FA]<sup>-</sup> adduct was identified as the most intense adduct for sucralose during compound tuning and was therefore used for sample screening.

## Results – Development and optimization of suspect screening workflow

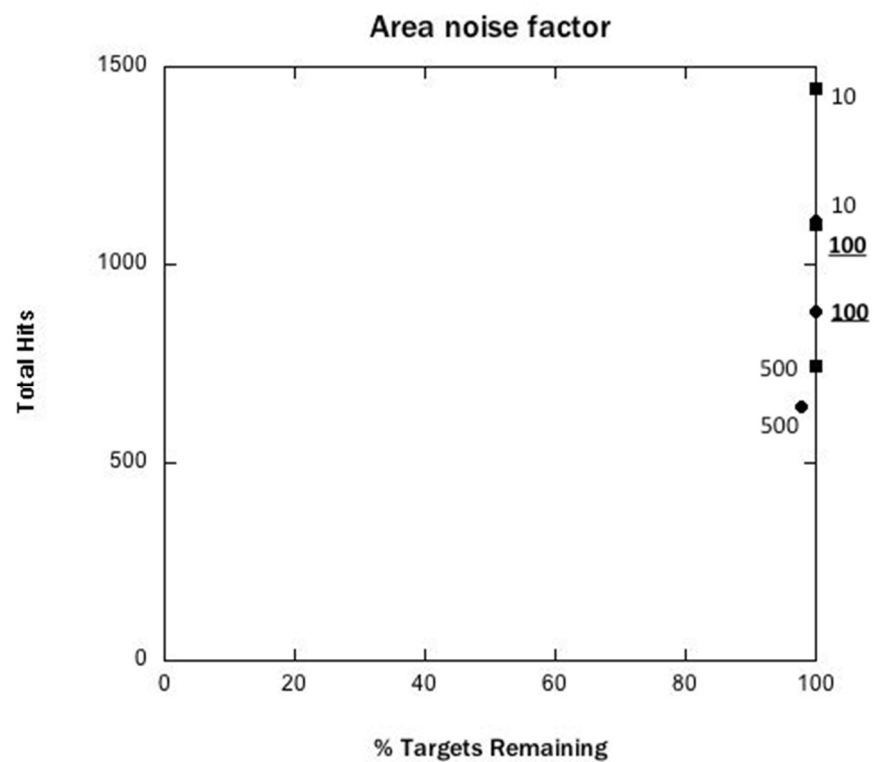

**Figure ES-1.** Optimization graph for area noise factor; low (25 ng/L) and high (750 ng/L) concentration samples are represented as circles and squares, respectively. Optimized value of 100 is shown underlined and bolded.

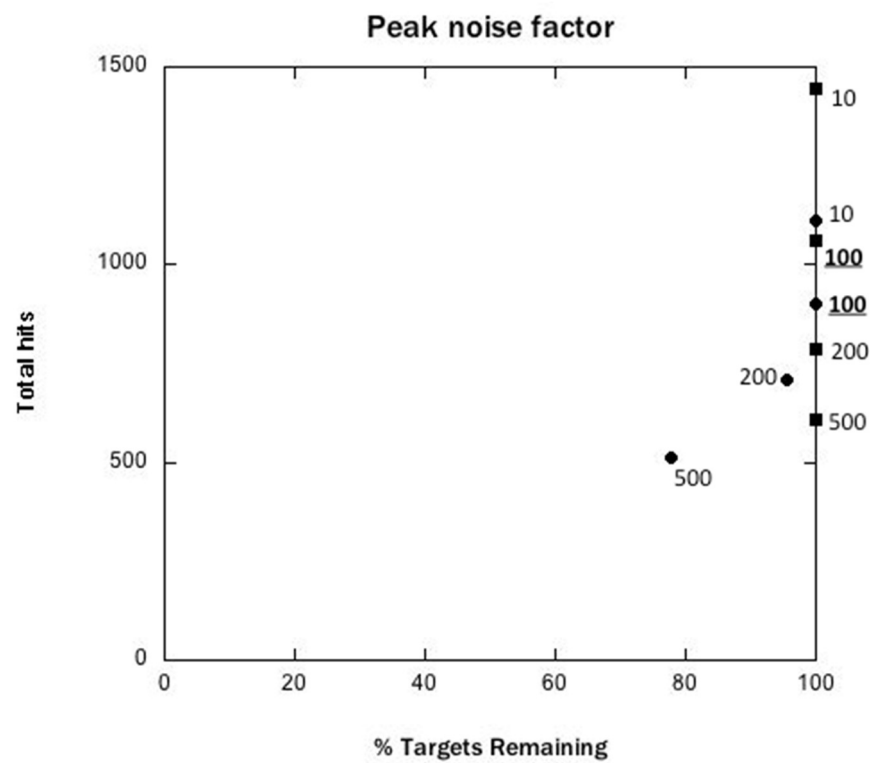

**Figure ES-2.** Optimization graph for peak noise factor; low (25 ng/L) and high (750 ng/L) concentration samples are represented as circles and squares, respectively. Optimized value of 100 is shown underlined and bolded.

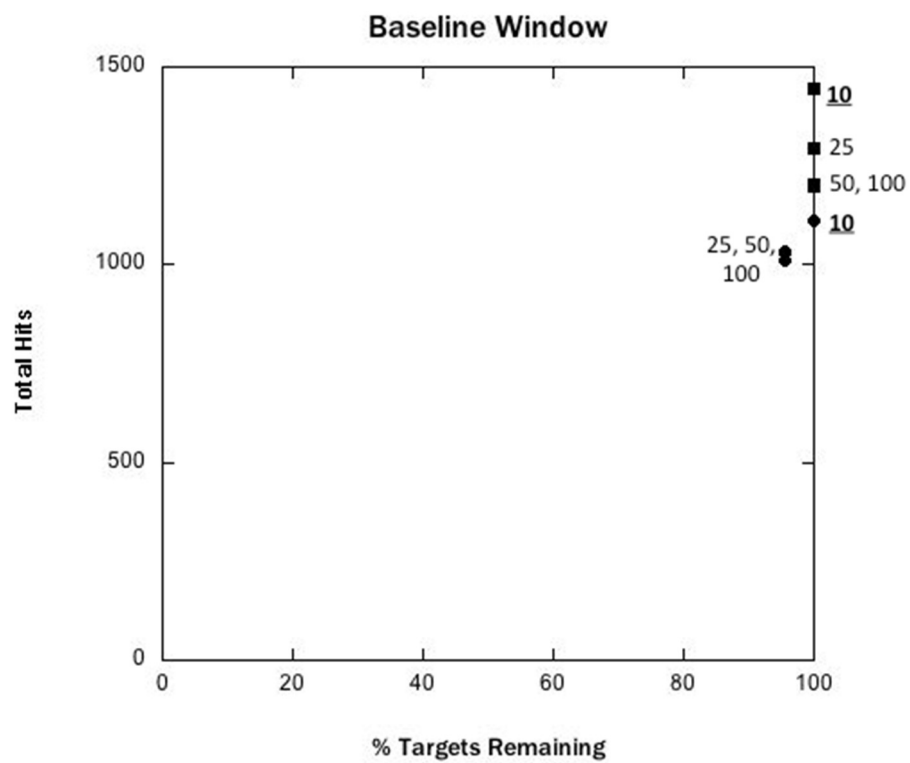

**Figure ES-3.** Optimization graph for baseline window; low (25 ng/L) and high (750 ng/L) concentration samples are represented as circles and squares, respectively. Optimized value of 10 is shown underlined and bolded.

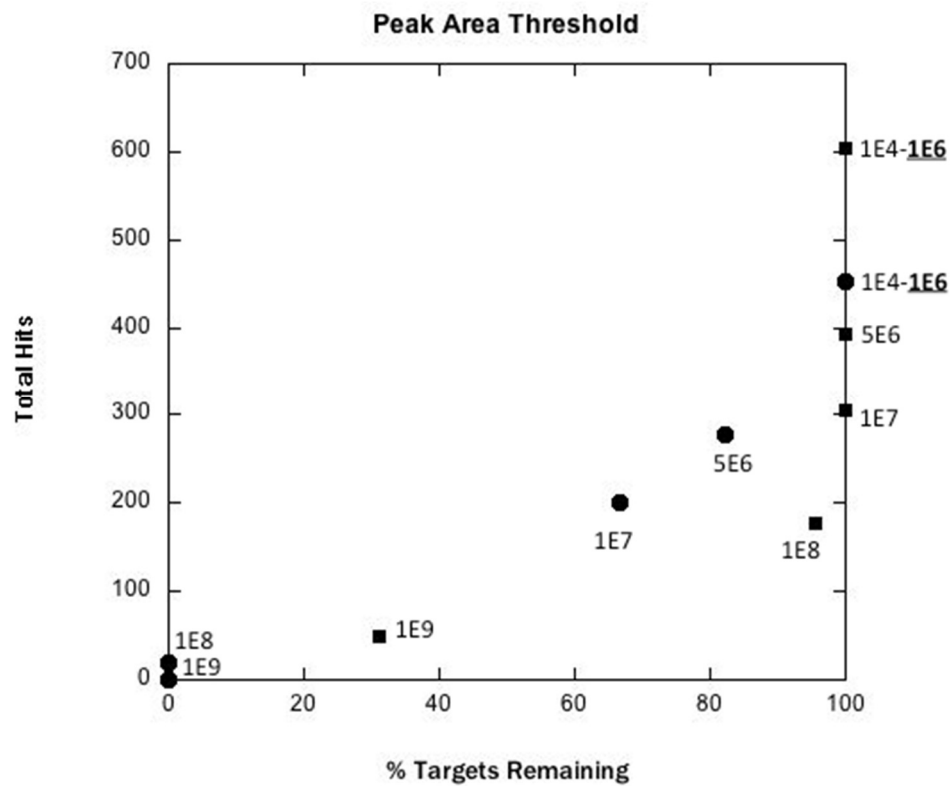

**Figure ES-4.** Optimization graph for peak area threshold; low (25 ng/L) and high (750 ng/L) concentration samples are represented as circles and squares, respectively. Optimized value of 1E6 is shown underlined and bolded.

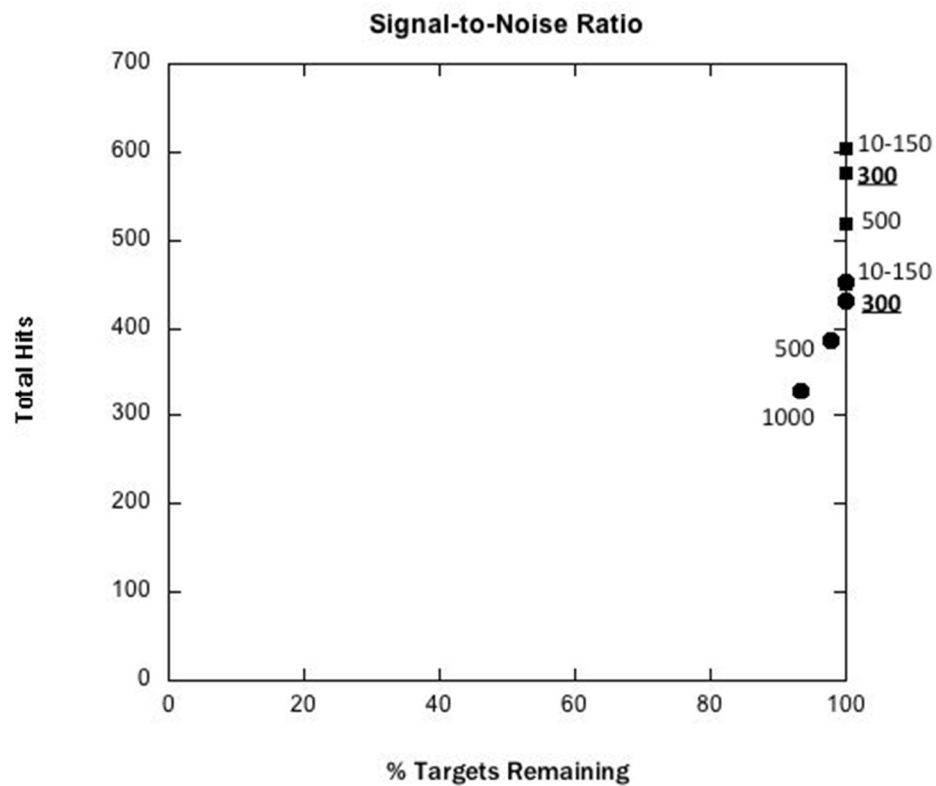

**Figure ES-5.** Optimization graph for signal-to-noise threshold; low (25 ng/L) and high (750 ng/L) concentration samples are represented as circles and squares, respectively. Optimized value of 300 is shown underlined and bolded.

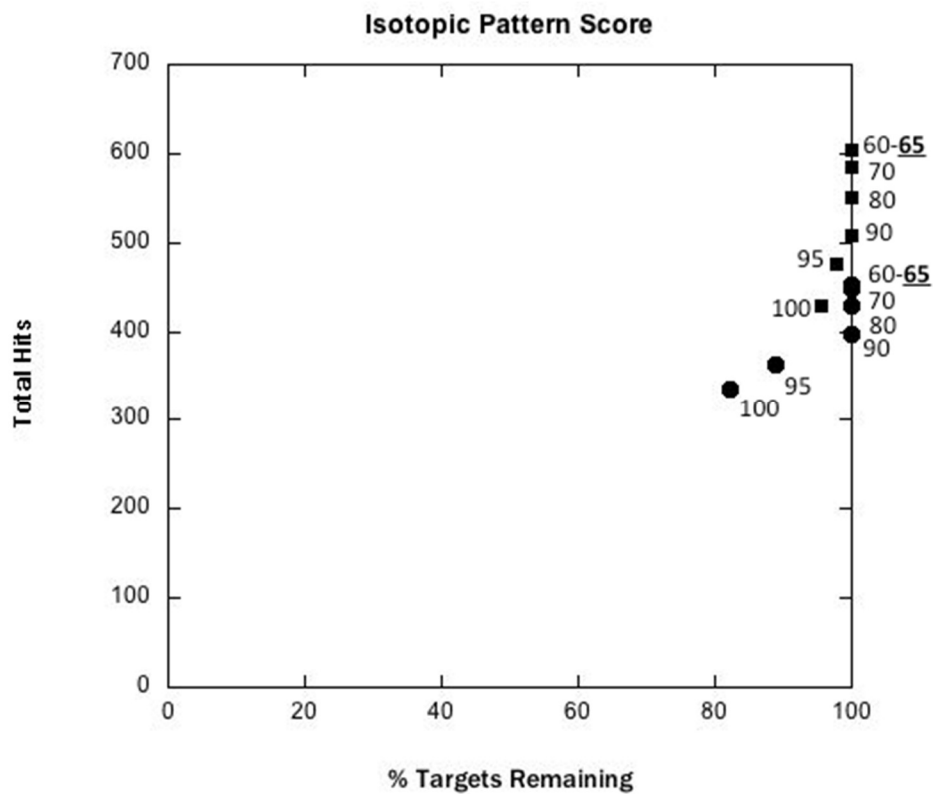

**Figure ES-6.** Optimization graph for isotopic pattern score; low (25 ng/L) and high (750 ng/L) concentration samples are represented as circles and squares, respectively. Chosen value of 65% is shown bolded and underlined.



**Table ES-3.** ICIS peak detection parameters isotopic pattern parameters used in TraceFinder v3.1.

| <b>Peak Detection Parameters</b>   | <b>Value</b> |
|------------------------------------|--------------|
| Detection method                   | All          |
| Smoothing                          | 1            |
| Area noise factor                  | 100          |
| Peak noise factor                  | 100          |
| Baseline window                    | 10           |
| Noise method                       | Incos        |
| Min peak width                     | 5            |
| Multiplet resolution               | 10           |
| Area tail extension                | 5            |
| Area scan window                   | 0            |
| Peak area threshold                | 1E6          |
| Signal-to-noise ratio              | 300          |
| <b>Isotopic Pattern Parameters</b> |              |
| Isotopic pattern fit threshold (%) | 65           |
| Allowed mass deviation (ppm)       | 10           |
| Allowed intensity deviation (%)    | 10           |

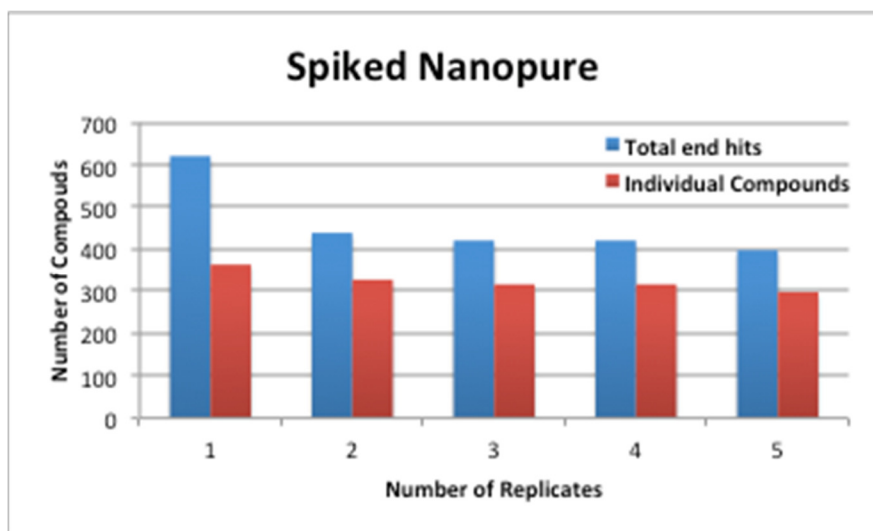

**Figure ES-7.** Optimization graph for the replication filter; the total number of suspect hits (blue bars) and the number of unique suspect hits (red bars) approached a steady-state at three replicate injections.

## Results – Application of suspect screening workflow

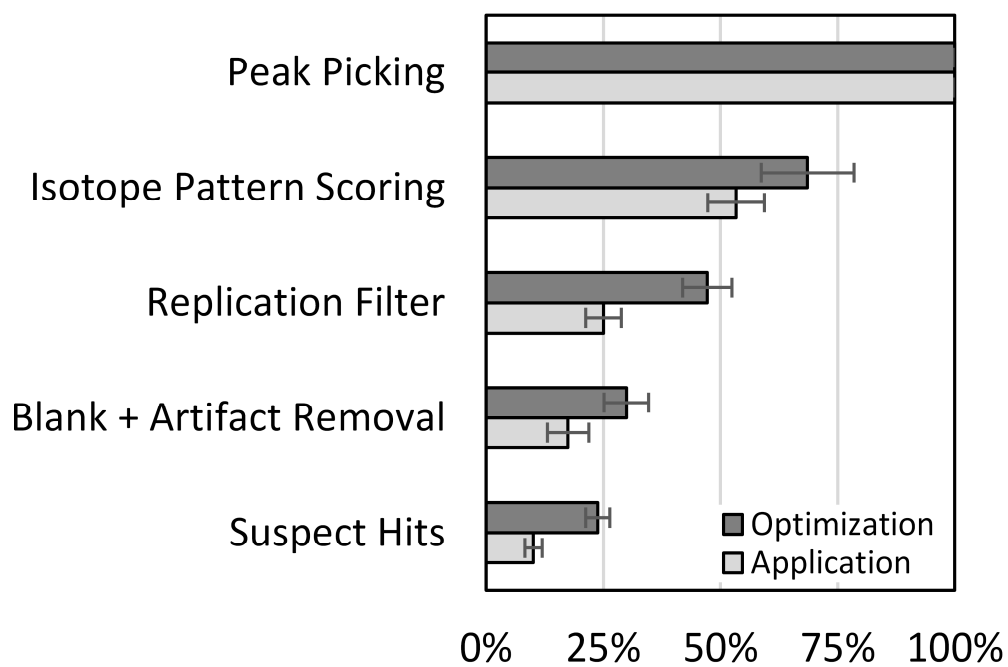

**Figure ES-8.** Comparison of the percent reduction in suspect hits for the application samples and optimization samples after each step in the suspect screening workflow.

## Results – Prioritization strategies

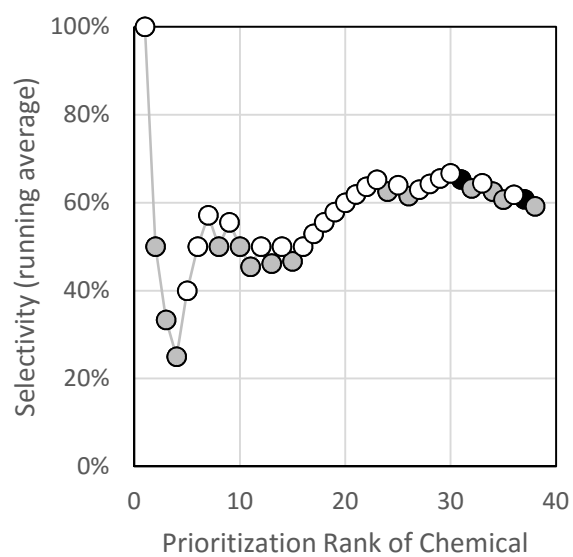

**Figure ES-9.** The running selectivity versus the prioritization rank of the chemical for the WOS prioritization strategy. A total of 38 suspect hits were on the prioritization list with 22 confirmations (white circles), 14 failed confirmations (gray circles), and 2 suspect hits for which authentic standards were not acquired (black circles).

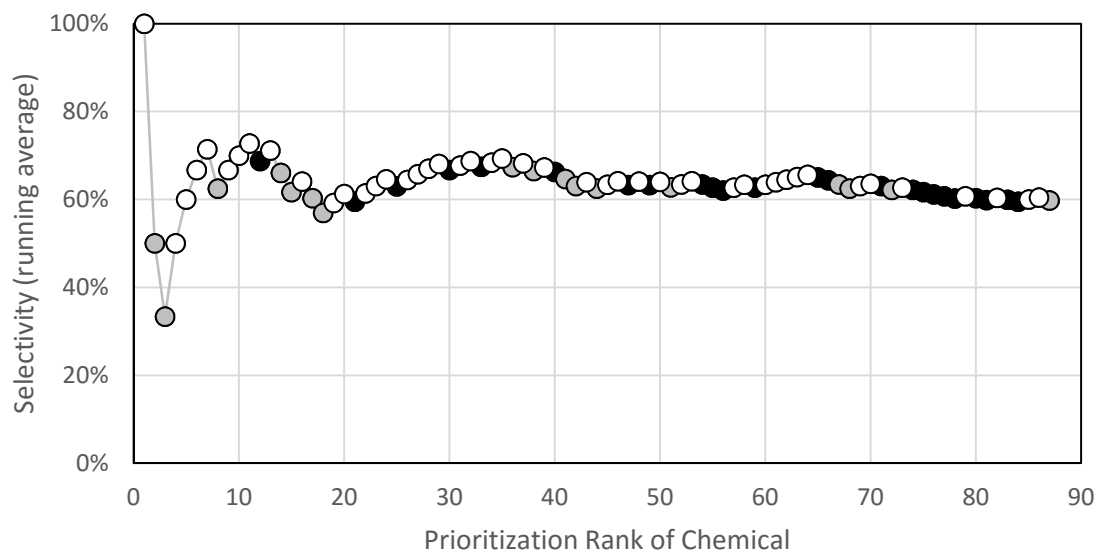

**Figure ES-10.** The running selectivity versus the prioritization rank of the chemical for the WOS + WWTPs prioritization strategy. A total of 87 suspect hits were on the prioritization list with 46 confirmations (white circles), 17 failed confirmations (gray circles), and 24 suspect hits for which authentic standards were not acquired (black circles).

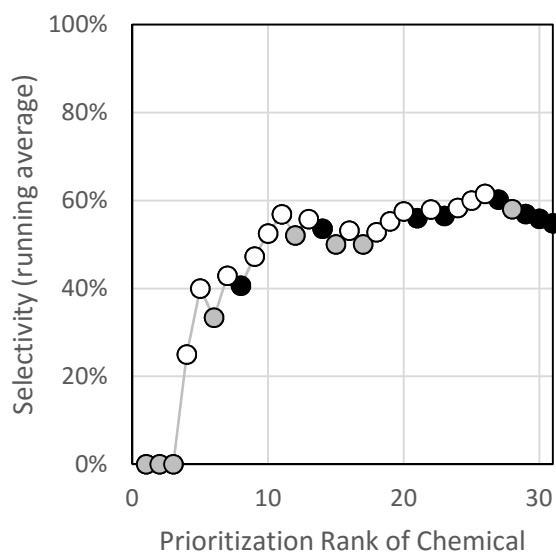

**Figure ES-11.** The running selectivity versus the prioritization rank of the chemical for the WOS + lake prioritization strategy. A total of 30 suspect hits were on the prioritization list with 15 confirmations (white circles), 8 failed confirmations (gray circles), and 7 suspect hits for which authentic standards were not acquired (black circles).

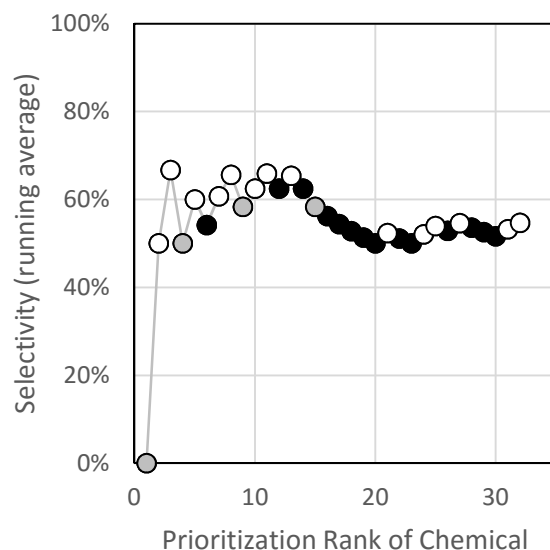

**Figure ES-12.** The running selectivity versus the prioritization rank of the chemical for the WOS + DWTP intake prioritization strategy. A total of 32 suspect hits were on the prioritization list with 14 confirmations (white circles), 4 failed confirmations (gray circles), and 14 suspect hits for which authentic standards were not acquired (black circles).

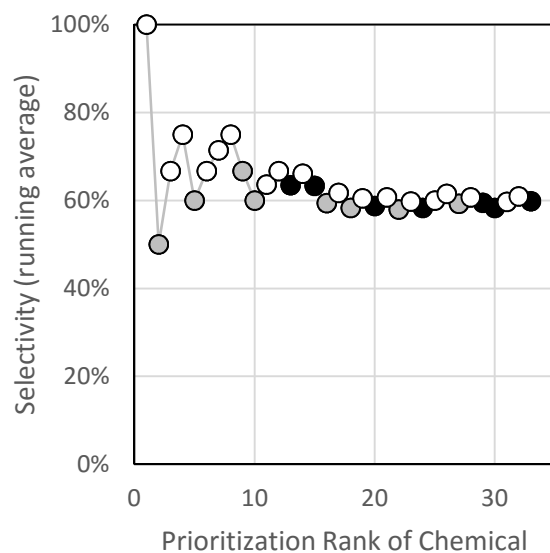

**Figure ES-13.** The running selectivity versus the prioritization rank of the chemical for the WOS + chlorine atom prioritization strategy. A total of 33 suspect hits were on the prioritization list with 18 confirmations (white circles), 8 failed confirmations (gray circles), and 7 suspect hits for which authentic standards were not acquired (black circles).

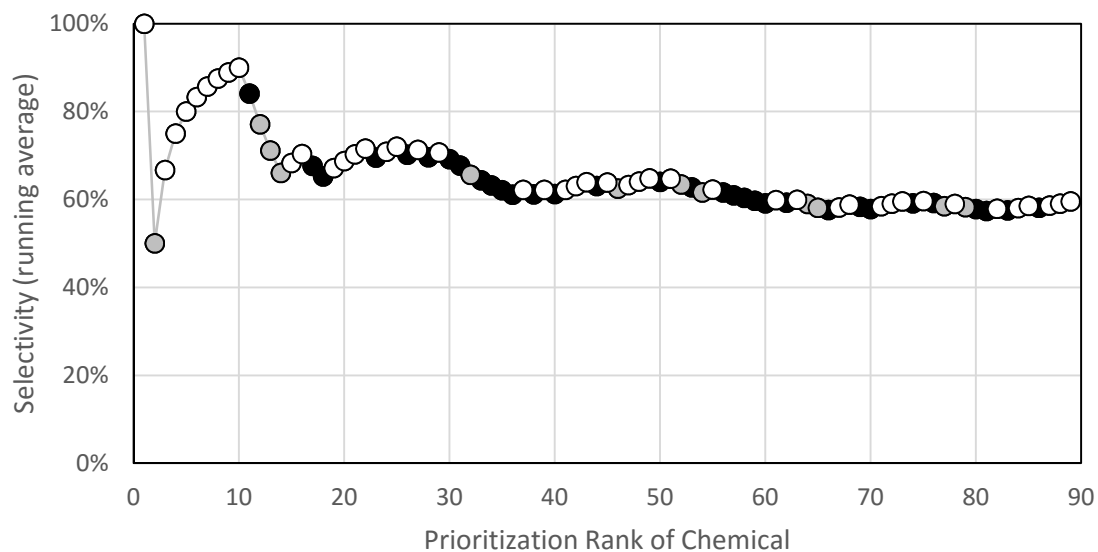

**Figure ES-14.** The running selectivity versus the prioritization rank of the chemical for the WOS + USGS prioritization strategy. A total of 89 suspect hits were on the prioritization list with 45 confirmations (white circles), 12 failed confirmations (gray circles), and 32 suspect hits for which authentic standards were not acquired (black circles).

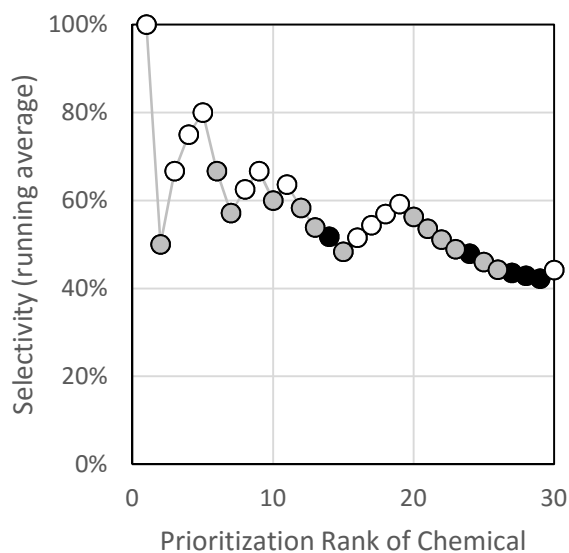

**Figure ES-15.** The running selectivity versus the prioritization rank of the chemical for the WOS + PPIMS strategy. A total of 30 suspect hits were on the prioritization list with 12 confirmations (white circles), 13 failed confirmations (gray circles), and 5 suspect hits for which authentic standards were not acquired (black circles).

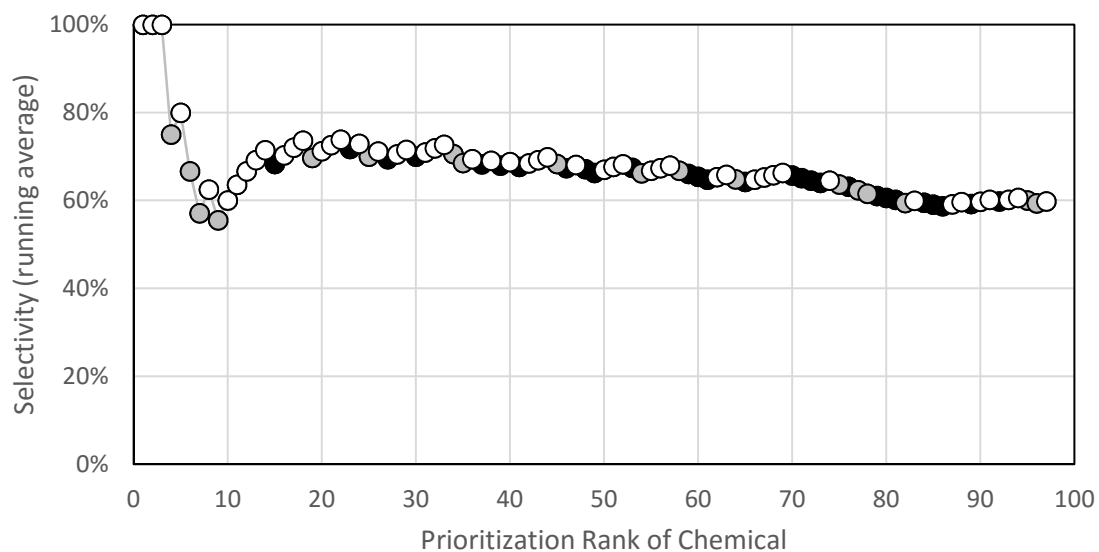

**Figure ES-16.** The running selectivity versus the prioritization rank of the chemical for the WOS + WWTPs + pharmaceuticals strategy. A total of 97 suspect hits were on the prioritization list with 51 confirmations (white circles), 18 failed confirmations (gray circles), and 28 suspect hits for which authentic standards were not acquired (black circles).



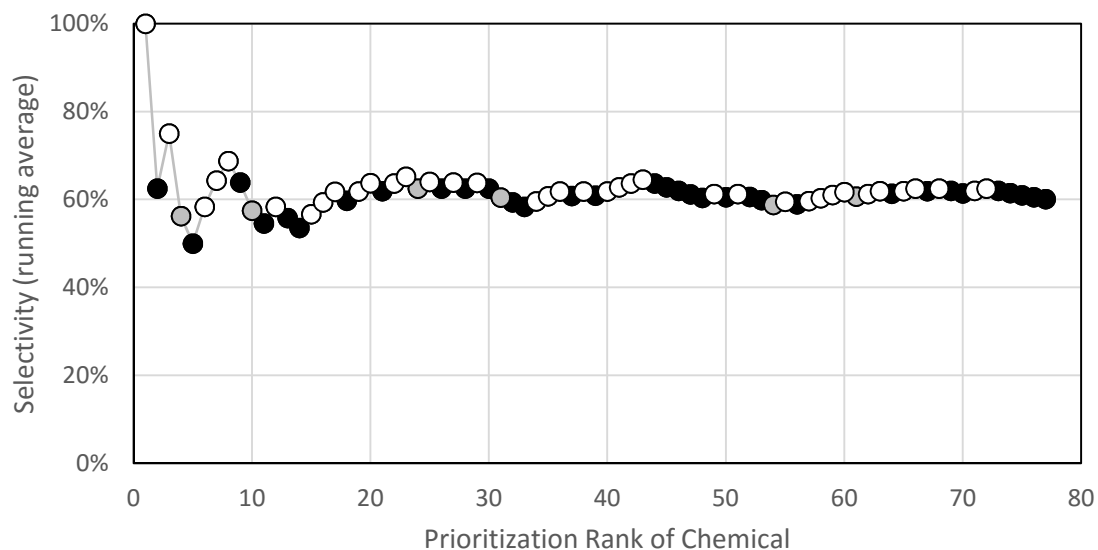

**Figure ES-17.** The running selectivity versus the prioritization rank of the chemical for the peak area prioritization strategy. A total of 77 suspect hits were on the prioritization list with 38 confirmations (white circles), 6 failed confirmations (gray circles), and 33 suspect hits for which authentic standards were not acquired (black circles).

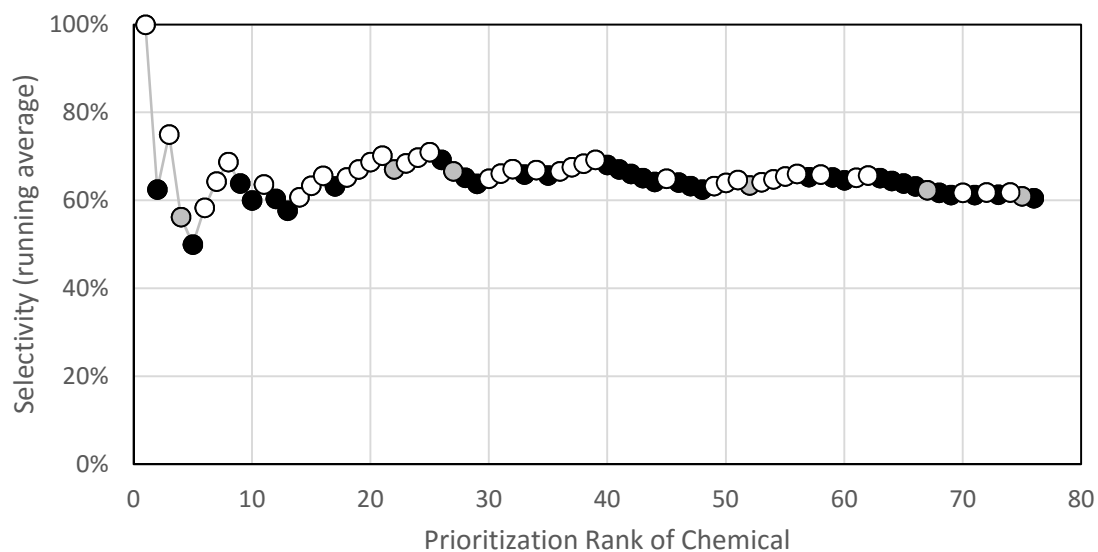

**Figure ES-18.** The running selectivity versus the prioritization rank of the chemical for the peak area + WWTPs prioritization strategy. A total of 78 suspect hits were on the prioritization list with 38 confirmations (white circles), 6 failed confirmations (gray circles), and 34 suspect hits for which authentic standards were not acquired (black circles).

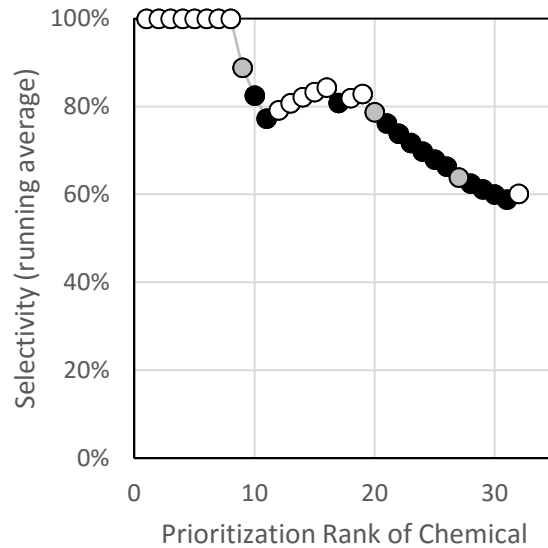

**Figure ES-19.** The running selectivity versus the prioritization rank of the chemical for the peak area + lake prioritization strategy. A total of 32 suspect hits were on the prioritization list with 16 confirmations (white circles), 3 failed confirmations (gray circles), and 13 suspect hits for which authentic standards were not acquired (black circles).

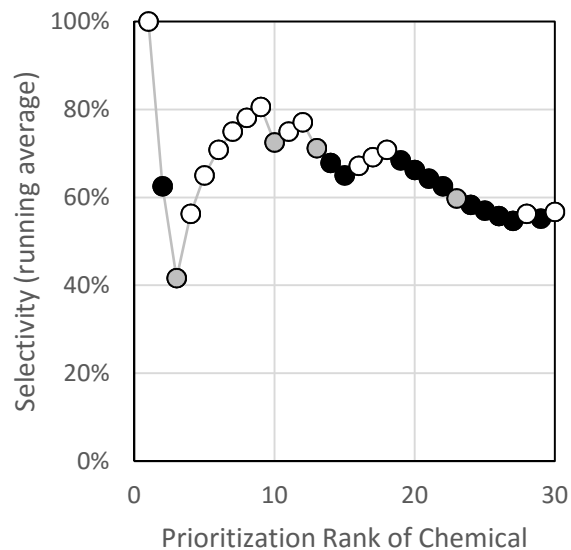

**Figure ES-20.** The running selectivity versus the prioritization rank of the chemical for the peak area + DWTP intake prioritization strategy. A total of 30 suspect hits were on the prioritization list with 14 confirmations (white circles), 6 failed confirmations (gray circles), and 12 suspect hits for which authentic standards were not acquired (black circles).

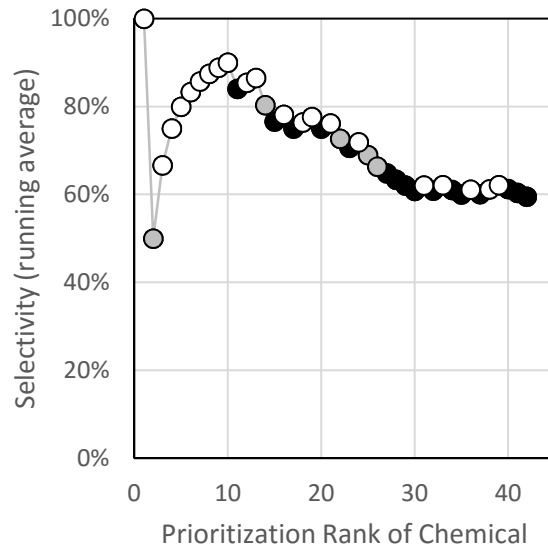

**Figure ES-21.** The running selectivity versus the prioritization rank of the chemical for the peak area + chlorine atom prioritization strategy. A total of 42 suspect hits were on the prioritization list with 21 confirmations (white circles), 5 failed confirmations (gray circles), and 16 suspect hits for which authentic standards were not acquired (black circles).

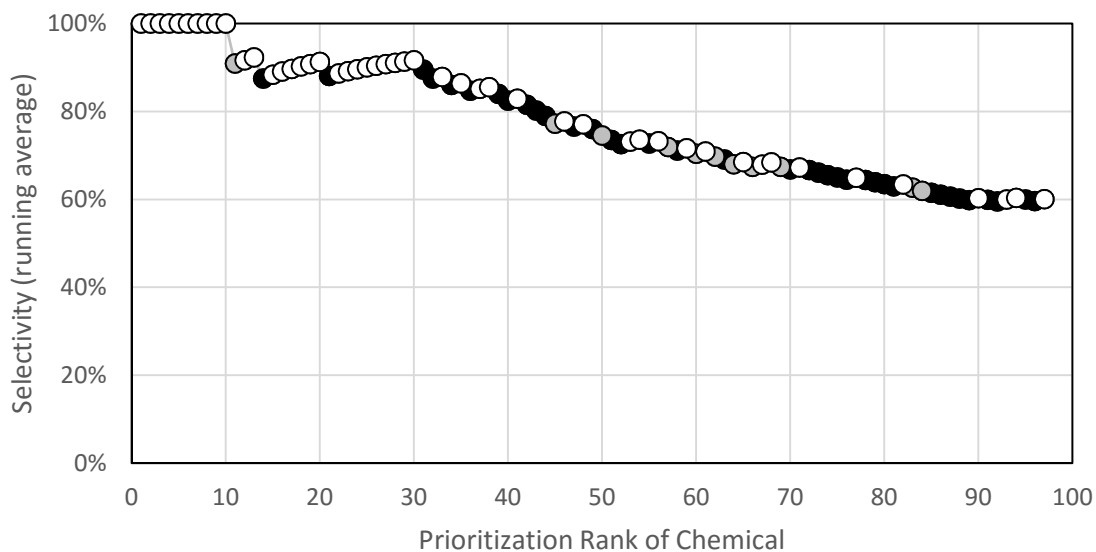

**Figure ES-22.** The running selectivity versus the prioritization rank of the chemical for the peak area + USGS prioritization strategy. A total of 97 suspect hits were on the prioritization list with 49 confirmations (white circles), 11 failed confirmations (gray circles), and 37 suspect hits for which authentic standards were not acquired (black circles).

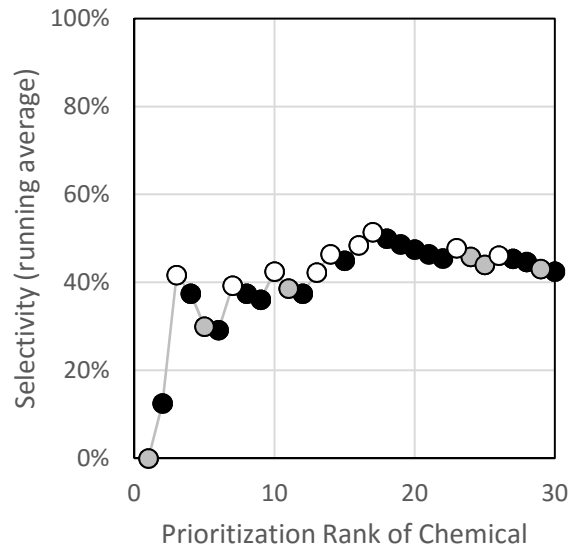

**Figure ES-23.** The running selectivity versus the prioritization rank of the chemical for the peak area + PPIMS strategy. A total of 30 suspect hits were on the prioritization list with 9 confirmations (white circles), 6 failed confirmations (gray circles), and 15 suspect hits for which authentic standards were not acquired (black circles).

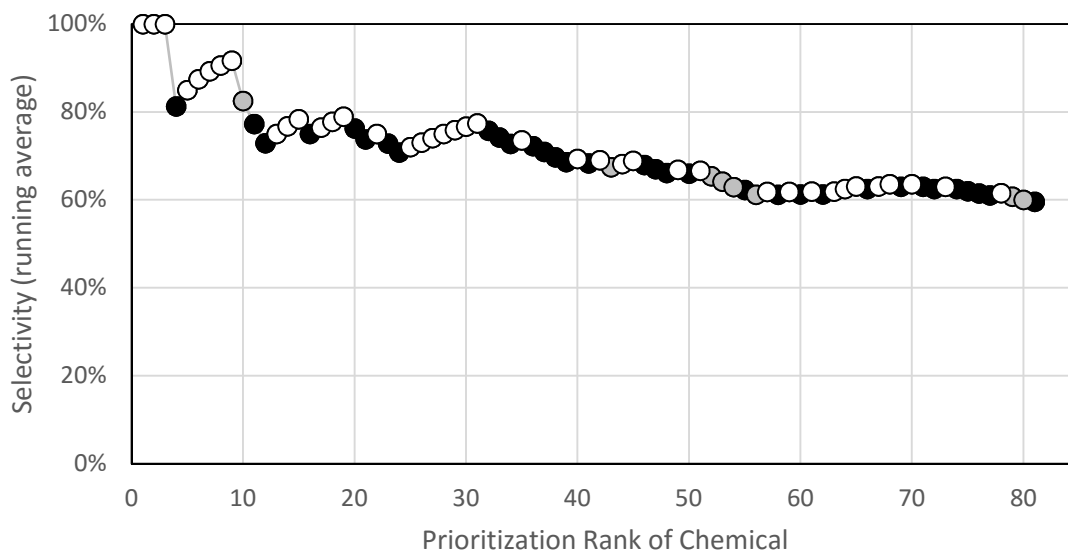

**Figure ES-24.** The running selectivity versus the prioritization rank of the chemical for the peak area + WWTPs + pharmaceuticals strategy. A total of 81 suspect hits were on the prioritization list with 40 confirmations (white circles), 8 failed confirmations (gray circles), and 33 suspect hits for which authentic standards were not acquired (black circles).

## Results – Investigated compounds

**Table ES-4.** List of 172 suspect hits that were compared with an authentic standard along with analytical details and confirmed/failed status.

| Compound                   | Chemical Formula | Status    | Accurate Mass <sup>a</sup>     | RT (min) | Fragments               |
|----------------------------|------------------|-----------|--------------------------------|----------|-------------------------|
| 10,11-dihydrocarbamazepine | C15H14N2O        | Failed    | 239.1170<br>[M+H] <sup>+</sup> | 7.0      | 194.10                  |
| 1H-Benzotriazole           | C6H5N3           | Confirmed | 120.0556<br>[M+H] <sup>+</sup> | 3.9      | 92.05, 65.04            |
| 2-Aminobenzimidazole       | C7H7N3           | Failed    | 134.0713<br>[M+H] <sup>+</sup> | 2.67     | 92.05, 107.06           |
| 2,4-D                      | C8H6Cl2O3        | Confirmed | 218.9621<br>[M-H] <sup>-</sup> | 8.1      | 160.96, 124.98          |
| 5-Methyl-1H-benzotriazole  | C7H7N3           | Confirmed | 134.0713<br>[M+H] <sup>+</sup> | 5.1      | 106.07, 53.04, 79.05    |
| Abacavir                   | C14H18N6O        | Confirmed | 287.1620<br>[M+H] <sup>+</sup> | 3.35     | 191.10, 150.06, 79.05   |
| Abscisic Acid              | C15H20O4         | Failed    | 265.1434<br>[M+H] <sup>+</sup> | 6.13     | 135.080, 187.11, 173.13 |
| Acesulfame                 | C4H5NO4S         | Confirmed | 161.9856<br>[M-H] <sup>-</sup> | 1.7      | 82.03, 77.96            |
| Acetaminophen              | C8H9NO2          | Confirmed | 152.0706<br>[M+H] <sup>+</sup> | 2.3      | 110.06, 93.03, 65.04    |
| Adenosine                  | C10H13N5O4       | Confirmed | 268.1037<br>[M+H] <sup>+</sup> | 1.5      | 136.06                  |
| Albuterol                  | C13H21NO3        | Confirmed | 240.1594<br>[M+H] <sup>+</sup> | 2.18     | 148.07, 121.06          |
| Allopurinol                | C5H4N4O          | Confirmed | 137.0463<br>[M+H] <sup>+</sup> | 1.47     | 110.04, 120.02, 72.94   |
| Amisulpride                | C17H27N3O4S      | Failed    | 370.1795<br>[M+H] <sup>+</sup> | 3.21     | 242.05, 112.11          |
| Amitriptyline              | C20H23N          | Failed    | 278.1903<br>[M+H] <sup>+</sup> | 7.75     | 233.13, 191.09, 91.05   |

|                    |                                                                 |           |                                |       |                         |
|--------------------|-----------------------------------------------------------------|-----------|--------------------------------|-------|-------------------------|
| Amphetamine        | C <sub>9</sub> H <sub>13</sub> N                                | Confirmed | 136.1121<br>[M+H] <sup>+</sup> | 3.3   | 91.05                   |
| Aspirin            | C <sub>9</sub> H <sub>8</sub> O <sub>4</sub>                    | Failed    | 179.0344<br>[M-H] <sup>-</sup> | 4.9   | 93.03, 122.96, 59.01    |
| Atenolol           | C <sub>14</sub> H <sub>22</sub> N <sub>2</sub> O <sub>3</sub>   | Confirmed | 267.1703<br>[M+H] <sup>+</sup> | 2.3   | 190.089, 145.06, 116.11 |
| Atenolol acid      | C <sub>14</sub> H <sub>21</sub> NO <sub>4</sub>                 | Confirmed | 268.1543<br>[M+H] <sup>+</sup> | 3.3   | 145.06, 191.07, 226.11  |
| Atomoxetine        | C <sub>17</sub> H <sub>21</sub> NO                              | Failed    | 256.1696<br>[M+H] <sup>+</sup> | 7.05  | 224.08, 148.11, 117.07  |
| Atrazine           | C <sub>8</sub> H <sub>14</sub> ClN <sub>5</sub>                 | Confirmed | 216.1011<br>[M+H] <sup>+</sup> | 7.3   | 174.05, 132.03, 104.00  |
| Atrazine-2-hydroxy | C <sub>8</sub> H <sub>15</sub> N <sub>5</sub> O                 | Confirmed | 198.1349<br>[M+H] <sup>+</sup> | 3.8   | 156.09, 114.07, 86.04   |
| Atrazine-desethyl  | C <sub>6</sub> H <sub>10</sub> ClN <sub>5</sub>                 | Confirmed | 188.0697<br>[M+H] <sup>+</sup> | 4.8   | 146.02, 104.00, 79.01   |
| Atropine           | C <sub>17</sub> H <sub>23</sub> NO <sub>3</sub>                 | Failed    | 290.1751<br>[M+H] <sup>+</sup> | 3.72  | 124.11, 93.07           |
| Azoxystrobin       | C <sub>22</sub> H <sub>17</sub> N <sub>3</sub> O <sub>5</sub>   | Failed    | 404.1241<br>[M+H] <sup>+</sup> | 8.7   | 372.10, 344.10, 316.11  |
| Bentazone          | C <sub>10</sub> H <sub>12</sub> N <sub>2</sub> O <sub>3</sub> S | Confirmed | 239.0496<br>[M-H] <sup>-</sup> | 6.6   | 132.03, 175.09, 197.00  |
| Benzophenone       | C <sub>13</sub> H <sub>10</sub> O                               | Confirmed | 183.0809<br>[M+H] <sup>+</sup> | 9     | 105.03, 53.04           |
| Benzophenone-3     | C <sub>14</sub> H <sub>12</sub> O <sub>3</sub>                  | Confirmed | 229.0864<br>[M+H] <sup>+</sup> | 10.95 | 151.04, 105.03          |
| Benzothiazole      | C <sub>7</sub> H <sub>5</sub> NS                                | Confirmed | 136.0221<br>[M+H] <sup>+</sup> | 5.65  | 136.02, 109.01          |
| Benzoylecgonine    | C <sub>16</sub> H <sub>19</sub> NO <sub>4</sub>                 | Confirmed | 290.1387<br>[M+H] <sup>+</sup> | 4     | 168.10, 105.03, 150.09  |
| Benzyladenine      | C <sub>12</sub> H <sub>11</sub> N <sub>5</sub>                  | Failed    | 226.1092<br>[M+H] <sup>+</sup> | 4.6   | 91.05, 148.06           |
| Bifenazate         | C <sub>17</sub> H <sub>20</sub> N <sub>2</sub> O <sub>3</sub>   | Failed    | 301.1552<br>[M+H] <sup>+</sup> | 10.06 | 174.06, 222.96, 146.06  |

|                             |               |           |                                |      |                        |
|-----------------------------|---------------|-----------|--------------------------------|------|------------------------|
| Bupropion                   | C13H18ClNO    | Confirmed | 240.1156<br>[M+H] <sup>+</sup> | 5.1  | 131.07, 166.04, 184.05 |
| Caffeine                    | C8H10N4O2     | Confirmed | 195.0877<br>[M+H] <sup>+</sup> | 3.4  | 138.07, 110.07, 84.96  |
| Camphor                     | C10H16O       | Failed    | 153.1274<br>[M+H] <sup>+</sup> | 8.15 | 97.07, 69.07           |
| Carbamazepine               | C15H12N2O     | Confirmed | 237.1022<br>[M+H] <sup>+</sup> | 6.6  | 194.10, 192.08         |
| Carbamazepine-10,11-epoxide | C15H12N2O2    | Confirmed | 253.0972<br>[M+H] <sup>+</sup> | 5.32 | 180.08, 182.10, 210.09 |
| Carbaryl                    | C12H11NO2     | Failed    | 202.0863<br>[M+H] <sup>+</sup> | 6.6  | 145.06, 155.06, 117.07 |
| Carbendazim                 | C9H9N3O2      | Confirmed | 192.0768<br>[M+H] <sup>+</sup> | 3.06 | 160.05, 132.06         |
| Carbofuran                  | C12H15NO3     | Failed    | 222.1125<br>[M+H] <sup>+</sup> | 6.05 | 123.04, 165.09, 137.06 |
| Carisoprodol                | C12H24N2O4    | Confirmed | 261.1815<br>[M+H] <sup>+</sup> | 7.6  | 97.10, 62.02, 158.12   |
| Cetirizine                  | C21H25ClN2O3  | Confirmed | 389.1626<br>[M+H] <sup>+</sup> | 8.3  | 201.05                 |
| Cimetidine                  | C10H16N6S     | Confirmed | 253.1236<br>[M+H] <sup>+</sup> | 2.3  | 150.09, 159.07, 117.05 |
| Ciprofloxacin               | C17H18FN3O3   | Confirmed | 332.1405<br>[M+H] <sup>+</sup> | 3.78 | 245.11, 288.15, 268.14 |
| Citalopram                  | C20H21FN2O    | Failed    | 325.1711<br>[M+H] <sup>+</sup> | 5.9  | 109.04, 262.10, 234.07 |
| Citric Acid                 | C6H8O7        | Confirmed | 191.0186<br>[M-H] <sup>-</sup> | 1.26 | 111.01, 87.01, 123.95  |
| Clarithromycin              | C38H69NO13    | Confirmed | 748.4842<br>[M+H] <sup>+</sup> | 8.75 | 157.12, 590.39, 558.36 |
| Clindamycin                 | C18H33ClN2O5S | Confirmed | 425.1877<br>[M+H] <sup>+</sup> | 5.95 | 126.13, 377.18         |
| Clofibric acid              | C10H11ClO3    | Failed    | 213.0324<br>[M-H] <sup>-</sup> | 8.9  | 126.99, 85.03          |

|                         |              |           |                                |      |                        |
|-------------------------|--------------|-----------|--------------------------------|------|------------------------|
| Codeine                 | C18H21NO3    | Confirmed | 300.1594<br>[M+H] <sup>+</sup> | 2.52 | 215.11, 243.10         |
| Corticosterone          | C21H30O4     | Failed    | 347.2217<br>[M+H] <sup>+</sup> | 8.2  | 121.07, 145.10, 97.07  |
| Cotinine                | C10H12N2O    | Confirmed | 177.1028<br>[M+H] <sup>+</sup> | 1.2  | 80.05, 98.06, 146.06   |
| DEET                    | C12H17NO     | Confirmed | 192.1383<br>[M+H] <sup>+</sup> | 7.5  | 119.05, 91.05, 72.04   |
| Desvenlafaxine          | C16H25NO2    | Confirmed | 264.1958<br>[M+H] <sup>+</sup> | 4.24 | 133.06, 107.05, 58.07  |
| Dextromethorphan        | C18H25NO     | Confirmed | 272.2009<br>[M+H] <sup>+</sup> | 5.8  | 215.14, 147.08         |
| Dicamba                 | C8H6Cl2O3    | Failed    | 218.9621<br>[M-H] <sup>-</sup> | 6.1  | 89.02                  |
| Diclofenac              | C14H11Cl2NO2 | Confirmed | 296.0240<br>[M+H] <sup>+</sup> | 11.5 | 215.05, 250.02, 184.02 |
| Diethyl-phthalate       | C12H14O4     | Confirmed | 223.0965<br>[M+H] <sup>+</sup> | 7.72 | 149.02, 121.03         |
| Dihydroxycarbamaz-epine | C15H14N2O3   | Failed    | 239.1179<br>[M+H] <sup>+</sup> | 7.02 | 194.10, 196.11, 222.09 |
| cis-Diltiazem           | C22H26N2O4S  | Confirmed | 415.1692<br>[M+H] <sup>+</sup> | 6.4  | 310.09, 178.03         |
| Dimethachlor            | C13H18ClNO2  | Failed    | 256.1099<br>[M+H] <sup>+</sup> | 7.92 | 224.08, 148.11         |
| Dimethyl-phthalate      | C10H10O4     | Confirmed | 195.0652<br>[M+H] <sup>+</sup> | 5.75 | 163.04, 135.04, 84.96  |
| Dinoseb                 | C10H12N2O5   | Failed    | 239.0663<br>[M-H] <sup>-</sup> | 11.9 | 194.05, 151.08         |
| Diphenhydramine         | C17H21NO     | Confirmed | 256.1701<br>[M+H] <sup>+</sup> | 5.95 | 167.09, 152.06         |
| Diuron                  | C9H10Cl2N2O  | Failed    | 233.0243<br>[M+H] <sup>+</sup> | 7.9  | 137.07, 94.07, 177.06  |
| Dopamine                | C8H11NO2     | Failed    | 154.0868<br>[M+H] <sup>+</sup> | 1.2  | 91.05, 119.05, 137.06  |



|                                       |              |           |                                 |      |                         |
|---------------------------------------|--------------|-----------|---------------------------------|------|-------------------------|
| Emtricitabine                         | C8H10FN3O3S  | Confirmed | 248.0494<br>[M+H] <sup>+</sup>  | 2.2  | 130.04, 101.01, 73.01   |
| Epinephrine                           | C9H13NO3     | Failed    | 184.0968<br>[M+H] <sup>+</sup>  | 1.1  | 107.05, 166.09, 151.06  |
| Estriol                               | C18H24O3     | Failed    | 311.1618<br>[M+Na] <sup>+</sup> | 5.85 | 208.88, 226.89, 190.87  |
| Ethofumesate                          | C13H18O5S    | Failed    | 287.0948<br>[M+H] <sup>+</sup>  | 8.9  | 121.06, 161.06, 137.06  |
| Ethyl 3-(N-butylacetamido) propionate | C11H21NO3    | Confirmed | 216.1594<br>[M+H] <sup>+</sup>  | 6.6  | 128.11, 86.10           |
| Famotidine                            | C8H15N7O2S3  | Confirmed | 338.0527<br>[M+H] <sup>+</sup>  | 2.3  | 189.03, 155.04, 71.06   |
| Fenofibric Acid                       | C17H15ClO4   | Confirmed | 319.0732<br>[M+H] <sup>+</sup>  | 11.5 | 233.04, 138.99, 121.03  |
| Fexofenadine                          | C32H39NO4    | Confirmed | 502.2958<br>[M+H] <sup>+</sup>  | 7.35 | 484.28, 466.27, 171.12  |
| Fluconazole                           | C13H12F2N6O  | Confirmed | 307.1113<br>[M+H] <sup>+</sup>  | 4.5  | 220.067, 238.08, 169.05 |
| Flucytosine                           | C4H4FN3O     | Failed    | 130.0411<br>[M+H] <sup>+</sup>  | 1.1  | 113.01, 95.10, 87.04    |
| Fluoxetine                            | C17H18F3NO   | Confirmed | 310.1413<br>[M+H] <sup>+</sup>  | 8.35 | 265.16, 105.03, 223.11  |
| Fluridone                             | C19H14F3NO   | Confirmed | 330.1100<br>[M+H] <sup>+</sup>  | 8.45 | 310.10                  |
| Gabapentin                            | C9H17NO2     | Confirmed | 172.1332<br>[M+H] <sup>+</sup>  | 3.23 | 137.10, 154.12, 119.09  |
| Gemfibrozil                           | C15H22O3     | Confirmed | 251.1642<br>[M+H] <sup>+</sup>  | 13.5 | 178.97, 208.98, 194.97  |
| Gibberellic acid                      | C19H22O6     | Failed    | 345.1333<br>[M-H] <sup>-</sup>  | 4.55 | 143.09, 221.13, 71.05   |
| Haloperidol                           | C21H23ClFNO2 | Failed    | 376.1490<br>[M+H] <sup>+</sup>  | 6.8  | 165.07, 123.03, 358.14  |
| Hexazinone                            | C12H20N4O2   | Failed    | 253.1659<br>[M+H] <sup>+</sup>  | 6.08 | 171.09, 71.06, 85.08    |

|                             |              |           |                                 |      |                        |
|-----------------------------|--------------|-----------|---------------------------------|------|------------------------|
| Hydrochlorothiazide         | C7H8ClN3O4S2 | Confirmed | 297.9712<br>[M+H] <sup>+</sup>  | 2.33 | 232.98, 204.98, 280.95 |
| Hydrocodone                 | C18H21NO3    | Failed    | 300.1599<br>[M+H] <sup>+</sup>  | 2.84 | 199.08, 241.09         |
| Hydrocortisone              | C21H30O5     | Failed    | 363.2171<br>[M+H] <sup>+</sup>  | 7    | 121.06, 97.06, 309.18  |
| Ibuprofen                   | C13H18O2     | Confirmed | 229.1199<br>[M+Na] <sup>+</sup> | 11.9 | 151.04, 101.06, 83.05  |
| Indole-3-butyric acid (IBA) | C12H13NO2    | Failed    | 204.1018<br>[M+H] <sup>+</sup>  | 6.8  | 130.07, 144.08, 168.08 |
| Iodocarb                    | C8H12INO2    | Confirmed | 281.9985<br>[M+H] <sup>+</sup>  | 7.4  | 164.92, 57.07          |
| Iohexol                     | C19H26I3N3O9 | Confirmed | 821.8881<br>[M+H] <sup>+</sup>  | 1.9  | 803.88, 602.91, 652.87 |
| Irbesartan                  | C25H28N6O    | Confirmed | 429.2397<br>[M+H] <sup>+</sup>  | 7.9  | 207.09, 195.19         |
| Irgarol                     | C11H19N5S    | Confirmed | 254.1434<br>[M+H] <sup>+</sup>  | 8.2  | 198.08, 91.03          |
| Isoproturon                 | C12H18N2O    | Failed    | 207.1491<br>[M+H] <sup>+</sup>  | 7.7  | 72.05, 134.10          |
| Ketamine                    | C13H16ClNO   | Confirmed | 238.0998<br>[M+H] <sup>+</sup>  | 3.93 | 125.02, 179.06, 163.03 |
| Ketoprofen                  | C16H14O3     | Confirmed | 255.1016<br>[M+H] <sup>+</sup>  | 8.45 | 105.03, 209.10, 177.05 |
| Lacosamide                  | C13H18N2O3   | Failed    | 251.1390<br>[M+H] <sup>+</sup>  | 4.45 | 91.05, 116.07, 74.06   |
| Lamotrigine                 | C9H7Cl2N5    | Confirmed | 256.0151<br>[M+H] <sup>+</sup>  | 4.66 | 210.98                 |
| Levamisole                  | C11H12N2S    | Confirmed | 205.0794<br>[M+H] <sup>+</sup>  | 2.8  | 178.07, 129.07         |
| Levetiracetam               | C8H14N2O2    | Confirmed | 171.1123<br>[M+H] <sup>+</sup>  | 2.75 | 126.09, 69.03, 98.10   |
| Levofloxacin                | C18H20FN3O4  | Confirmed | 362.1516<br>[M+H] <sup>+</sup>  | 3.55 | 318.16, 261.10         |

|                 |             |           |                                |      |                        |
|-----------------|-------------|-----------|--------------------------------|------|------------------------|
| Lidocaine       | C14H22N2O   | Confirmed | 235.1805<br>[M+H] <sup>+</sup> | 3.7  | 86.10                  |
| Linezolid       | C16H20FN3O4 | Failed    | 338.1516<br>[M+H] <sup>+</sup> | 4.8  | 296.14, 235.12, 195.09 |
| Losartan        | C22H23ClN6O | Confirmed | 423.1695<br>[M+H] <sup>+</sup> | 7.9  | 207.09, 235.10, 171.07 |
| Malaoxon        | C10H19O7PS  | Failed    | 315.0667<br>[M+H] <sup>+</sup> | 6.2  | 99.01, 127.04, 142.99  |
| Mecoprop        | C10H11ClO3  | Confirmed | 213.0324<br>[M-H] <sup>-</sup> | 9.7  | 141.01                 |
| Melamine        | C3H6N6      | Confirmed | 127.0727<br>[M+H] <sup>+</sup> | 1.1  | 85.05, 68.03, 110.05   |
| Meprobamate     | C9H18N2O4   | Failed    | 219.1345<br>[M+H] <sup>+</sup> | 5.4  | 97.10, 55.06, 69.07    |
| Metalaxyl       | C15H21NO4   | Confirmed | 280.1543<br>[M+H] <sup>+</sup> | 7.6  | 160.11, 192.14, 220.13 |
| Metaxalone      | C12H15NO3   | Confirmed | 222.1125<br>[M+H] <sup>+</sup> | 7.05 | 133.10, 105.07, 161.10 |
| Metformin       | C4H11N5     | Confirmed | 130.1087<br>[M+H] <sup>+</sup> | 1.1  | 71.06, 60.06, 85.05    |
| Methadone       | C21H27NO    | Confirmed | 310.2165<br>[M+H] <sup>+</sup> | 7.45 | 105.03, 265.16, 223.11 |
| Methocarbamol   | C11H15NO5   | Confirmed | 242.1028<br>[M+H] <sup>+</sup> | 4.7  | 118.05, 163.08, 62.02  |
| Metolachlor     | C15H22ClNO2 | Confirmed | 284.1412<br>[M+H] <sup>+</sup> | 10.5 | 252.11, 176.14         |
| Metolachlor ESA | C15H23NO5S  | Confirmed | 330.1370<br>[M+H] <sup>+</sup> | 6.65 | 298.11, 202.12, 160.11 |
| Metoprolol      | C15H25NO3   | Confirmed | 268.1907<br>[M+H] <sup>+</sup> | 4.5  | 191.11, 159.08, 116.11 |
| Metronidazole   | C6H9N3O3    | Confirmed | 172.0722<br>[M+H] <sup>+</sup> | 2.3  | 128.05, 98.05          |
| Morphine        | C17H19NO3   | Confirmed | 286.1438<br>[M+H] <sup>+</sup> | 1.56 | 201.09, 229.09         |

|                               |              |           |                                |      |                        |
|-------------------------------|--------------|-----------|--------------------------------|------|------------------------|
| N,N-Didesmethyl-venlafaxine   | C15H23NO2    | Failed    | 250.1802<br>[M+H] <sup>+</sup> | 5.52 | 121.06, 147.08, 215.14 |
| N4-acetylsulfadiazine         | C12H12N4O3S  | Failed    | 293.0703<br>[M+H] <sup>+</sup> | 3.2  | 134.06, 198.02, 108.04 |
| N4-Acetylsulfamethoxazole     | C12H13N3O4S  | Confirmed | 296.0701<br>[M+H] <sup>+</sup> | 4.8  | 134.06, 198.02, 108.04 |
| Nadolol                       | C17H27NO4    | Confirmed | 310.2013<br>[M+H] <sup>+</sup> | 3.55 | 254.14, 201.09, 236.13 |
| Naproxen                      | C14H14O3     | Confirmed | 231.1016<br>[M+H] <sup>+</sup> | 9    | 175.06, 185.10, 170.07 |
| Nicotine                      | C10H14N2     | Confirmed | 163.1231<br>[M+H] <sup>+</sup> | 1.11 | 130.07, 117.06         |
| Norfloxacin                   | C16H18F1N3O3 | Failed    | 320.1405<br>[M+H] <sup>+</sup> | 3.7  | 276.15, 233.11, 256.14 |
| Ofloxacin                     | C18H20FN3O4  | Confirmed | 362.1511<br>[M+H] <sup>+</sup> | 3.53 | 318.16, 261.10         |
| Oxcarbazepine                 | C15H12N2O2   | Confirmed | 253.0972<br>[M+H] <sup>+</sup> | 5.7  | 208.08, 180.08, 236.07 |
| Paraxanthine                  | C7H8N4O2     | Confirmed | 181.0726<br>[M+H] <sup>+</sup> | 2.8  | 96.06, 124.05, 84.96   |
| Penciclovir                   | C10H15N5O3   | Failed    | 254.1248<br>[M+H] <sup>+</sup> | 1.32 | 152.06, 67.05          |
| Pentachlorophenol (PCP)       | C6HCl5O      | Failed    | 262.8392<br>[M-H] <sup>-</sup> | 14.4 | 92.93                  |
| Pentobarbital                 | C11H18N2O3   | Confirmed | 227.1395<br>[M+H] <sup>+</sup> | 2.03 | 70.07, 130.09          |
| Pentoxifylline                | C13H18N4O3   | Confirmed | 279.1457<br>[M+H] <sup>+</sup> | 4.7  | 181.07, 138.07, 99.08  |
| Perfluorobutyric acid (PFBA)  | C4HF7O2      | Confirmed | 212.9792<br>[M-H] <sup>-</sup> | 4.5  | 168.99                 |
| Perfluorooctanoic acid (PFOA) | C8HF15O2     | Confirmed | 412.9664<br>[M-H] <sup>-</sup> | 11.2 | 168.99, 118.99         |
| Phenobarbital                 | C12H12N2O3   | Failed    | 231.077<br>[M-H] <sup>-</sup>  | 5.25 | 111.08, 156.95, 140.96 |

|                 |                                                                 |           |                                |      |                        |
|-----------------|-----------------------------------------------------------------|-----------|--------------------------------|------|------------------------|
| Phenylephrine   | C <sub>9</sub> H <sub>13</sub> NO <sub>2</sub>                  | Failed    | 168.1025<br>[M+H] <sup>+</sup> | 1.35 | 91.05, 109.06, 135.07  |
| Phenytoin       | C <sub>15</sub> H <sub>12</sub> N <sub>2</sub> O <sub>2</sub>   | Failed    | 253.0977<br>[M+H] <sup>+</sup> | 6.5  | 182.10, 104.05         |
| Pirimicarb      | C <sub>11</sub> H <sub>18</sub> N <sub>4</sub> O <sub>2</sub>   | Failed    | 239.1503<br>[M+H] <sup>+</sup> | 4.1  | 72.04, 137.07, 182.13  |
| Primidone       | C <sub>12</sub> H <sub>14</sub> N <sub>2</sub> O <sub>2</sub>   | Failed    | 219.1128<br>[M+H] <sup>+</sup> | 4.6  | 91.05, 162.09, 119.09  |
| Progesterone    | C <sub>21</sub> H <sub>30</sub> O <sub>2</sub>                  | Failed    | 315.2324<br>[M+H] <sup>+</sup> | 11.6 | 109.06, 97.07, 170.07  |
| Prometon        | C <sub>10</sub> H <sub>19</sub> N <sub>5</sub> O                | Confirmed | 226.1662<br>[M+H] <sup>+</sup> | 5.8  | 142.07, 184.12, 100.05 |
| Propachlor ESA  | C <sub>11</sub> H <sub>15</sub> N <sub>4</sub> S                | Failed    | 256.0649<br>[M-H] <sup>-</sup> | 4.7  | 120.96, 79.96, 134.10  |
| Propachlor OXA  | C <sub>11</sub> H <sub>13</sub> NO <sub>3</sub>                 | Failed    | 208.0968<br>[M+H] <sup>+</sup> | 4.8  | 120.04, 92.05          |
| Propoxur        | C <sub>11</sub> H <sub>15</sub> NO <sub>3</sub>                 | Failed    | 210.1125<br>[M+H] <sup>+</sup> | 6    | 111.04, 93.03, 65.04   |
| Propranolol     | C <sub>16</sub> H <sub>21</sub> NO <sub>2</sub>                 | Confirmed | 260.1651<br>[M+H] <sup>+</sup> | 5.9  | 116.11, 183.08, 155.09 |
| Pseudoephedrine | C <sub>10</sub> H <sub>15</sub> NO                              | Confirmed | 166.1229<br>[M+H] <sup>+</sup> | 2.8  | 133.09, 148.11, 117.07 |
| Ranitidine      | C <sub>13</sub> H <sub>22</sub> N <sub>4</sub> O <sub>3</sub> S | Confirmed | 315.1485<br>[M+H] <sup>+</sup> | 2.2  | 176.05, 130.06, 98.08  |
| Ritalinic acid  | C <sub>13</sub> H <sub>17</sub> NO <sub>2</sub>                 | Confirmed | 220.1332<br>[M+H] <sup>+</sup> | 4.05 | 84.08, 174.13          |
| Saccharin       | C <sub>7</sub> H <sub>5</sub> NO <sub>3</sub> S                 | Confirmed | 181.9912<br>[M-H] <sup>-</sup> | 2.55 | 105.96, 61.97          |
| Sertraline      | C <sub>17</sub> H <sub>17</sub> Cl <sub>2</sub> N               | Failed    | 306.0816<br>[M+H] <sup>+</sup> | 8.9  | 158.98, 129.07, 121.06 |
| Siduron         | C <sub>14</sub> H <sub>20</sub> N <sub>2</sub> O                | Confirmed | 233.1653<br>[M+H] <sup>+</sup> | 8.9  | 137.07, 94.07, 120.04  |
| Simazine        | C <sub>7</sub> H <sub>12</sub> ClN <sub>5</sub>                 | Confirmed | 202.0854<br>[M+H] <sup>+</sup> | 6    | 132.03, 96.06, 124.09  |

|                                              |              |           |                                 |       |                        |
|----------------------------------------------|--------------|-----------|---------------------------------|-------|------------------------|
| Sitagliptin                                  | C16H15F6N5O  | Failed    | 408.1254<br>[M+H] <sup>+</sup>  | 4.55  | 235.08, 174.05, 193.07 |
| Sotalol                                      | C12H20N2O3S  | Confirmed | 273.1267<br>[M+H] <sup>+</sup>  | 2     | 133.08, 176.13, 213.07 |
| Sucralose                                    | C12H19Cl3O8  | Confirmed | 441.0128<br>[M-FA] <sup>-</sup> | 3.9   | 165.02, 121.03         |
| Sulfadiazine                                 | C10H10N4O2S  | Failed    | 251.0602<br>[M+H] <sup>+</sup>  | 2.35  | 156.01, 108.04, 96.06  |
| Sulfamethazine                               | C12H14N4O2S  | Failed    | 279.0910<br>[M+H] <sup>+</sup>  | 3.3   | 204.04, 124.09, 156.01 |
| Sulfamethoxazole                             | C10H11N3O3S  | Confirmed | 254.0594<br>[M+H] <sup>+</sup>  | 3.9   | 237.09, 156.01, 108.04 |
| Temazepam                                    | C16H13ClN2O2 | Confirmed | 301.0744<br>[M+H] <sup>+</sup>  | 8.11  | 255.07, 228.06         |
| Theophylline                                 | C7H8N4O2     | Confirmed | 181.0725<br>[M+H] <sup>+</sup>  | 3     | 124.05, 96.06, 84.96   |
| Thiabendazole                                | C10H7N3S     | Failed    | 202.0433<br>[M+H] <sup>+</sup>  | 3.45  | 175.03, 131.06         |
| Tramadol                                     | C16H25NO2    | Confirmed | 264.1958<br>[M+H] <sup>+</sup>  | 4.2   | 58.07                  |
| Triamterene                                  | C12H11N7     | Confirmed | 254.1154<br>[M+H] <sup>+</sup>  | 4     | 237.09, 156.01, 108.04 |
| Tributyl phosphate                           | C12H27O4P    | Confirmed | 267.1725<br>[M+H] <sup>+</sup>  | 13.1  | 98.98                  |
| Triclocarban                                 | C13H9Cl3N2O  | Confirmed | 314.9858<br>[M+H] <sup>+</sup>  | 13.35 | 161.99, 128.03, 93.06  |
| Triclosan                                    | C12H7Cl3O2   | Confirmed | 286.9428<br>[M-H] <sup>-</sup>  | 13.5  | 97.00, 115.92          |
| Trimethoprim                                 | C14H18N4O3   | Confirmed | 291.1452<br>[M+H] <sup>+</sup>  | 3.4   | 245.10, 123.07, 261.10 |
| Trinexapac-ethyl                             | C13H16O5     | Failed    | 253.1071<br>[M+H] <sup>+</sup>  | 7.9   | 69.03, 139.04, 165.02  |
| Tris(1,3-dichloro-2-propyl)phosphate (TDCPP) | C9H15Cl6O4P  | Confirmed | 428.8917<br>[M+H] <sup>+</sup>  | 11.9  | 98.98, 208.95, 75.00   |

|                                |                                                                 |           |                                |     |                        |
|--------------------------------|-----------------------------------------------------------------|-----------|--------------------------------|-----|------------------------|
| Tris(2-chloro-ethyl) phosphate | C <sub>6</sub> H <sub>12</sub> Cl <sub>3</sub> O <sub>4</sub> P | Confirmed | 284.9611<br>[M+H] <sup>+</sup> | 6.3 | 182.10, 98.98, 125.00  |
| Valsartan                      | C <sub>24</sub> H <sub>29</sub> N <sub>5</sub> O <sub>3</sub>   | Confirmed | 436.2343<br>[M+H] <sup>+</sup> | 9.7 | 235.10, 291.19, 207.09 |
| Venlafaxine                    | C <sub>17</sub> H <sub>27</sub> NO <sub>2</sub>                 | Confirmed | 278.2115<br>[M+H] <sup>+</sup> | 5.5 | 121.06, 147.08, 58.07  |

<sup>a</sup>Accurate mass is the mass measured by the quadrupole-orbitrap mass spectrometer.

<sup>b</sup>The [M+Na]<sup>+</sup> adduct was identified as the most intense adduct for estriol and ibuprofen during compound tuning and was therefore used for sample screening.
